# Supplementary material for: Intrinsic Resistance of Burkholderia cepacia Complex to Benzalkonium Chloride
Source: PubMed Central journal article supplement (PMC5120141; doi:10.1128/mbio.01716-16), 2016-11-22
Supplement: mbo006163084sf1.pdf [file mbo006163084sf1.pdf]

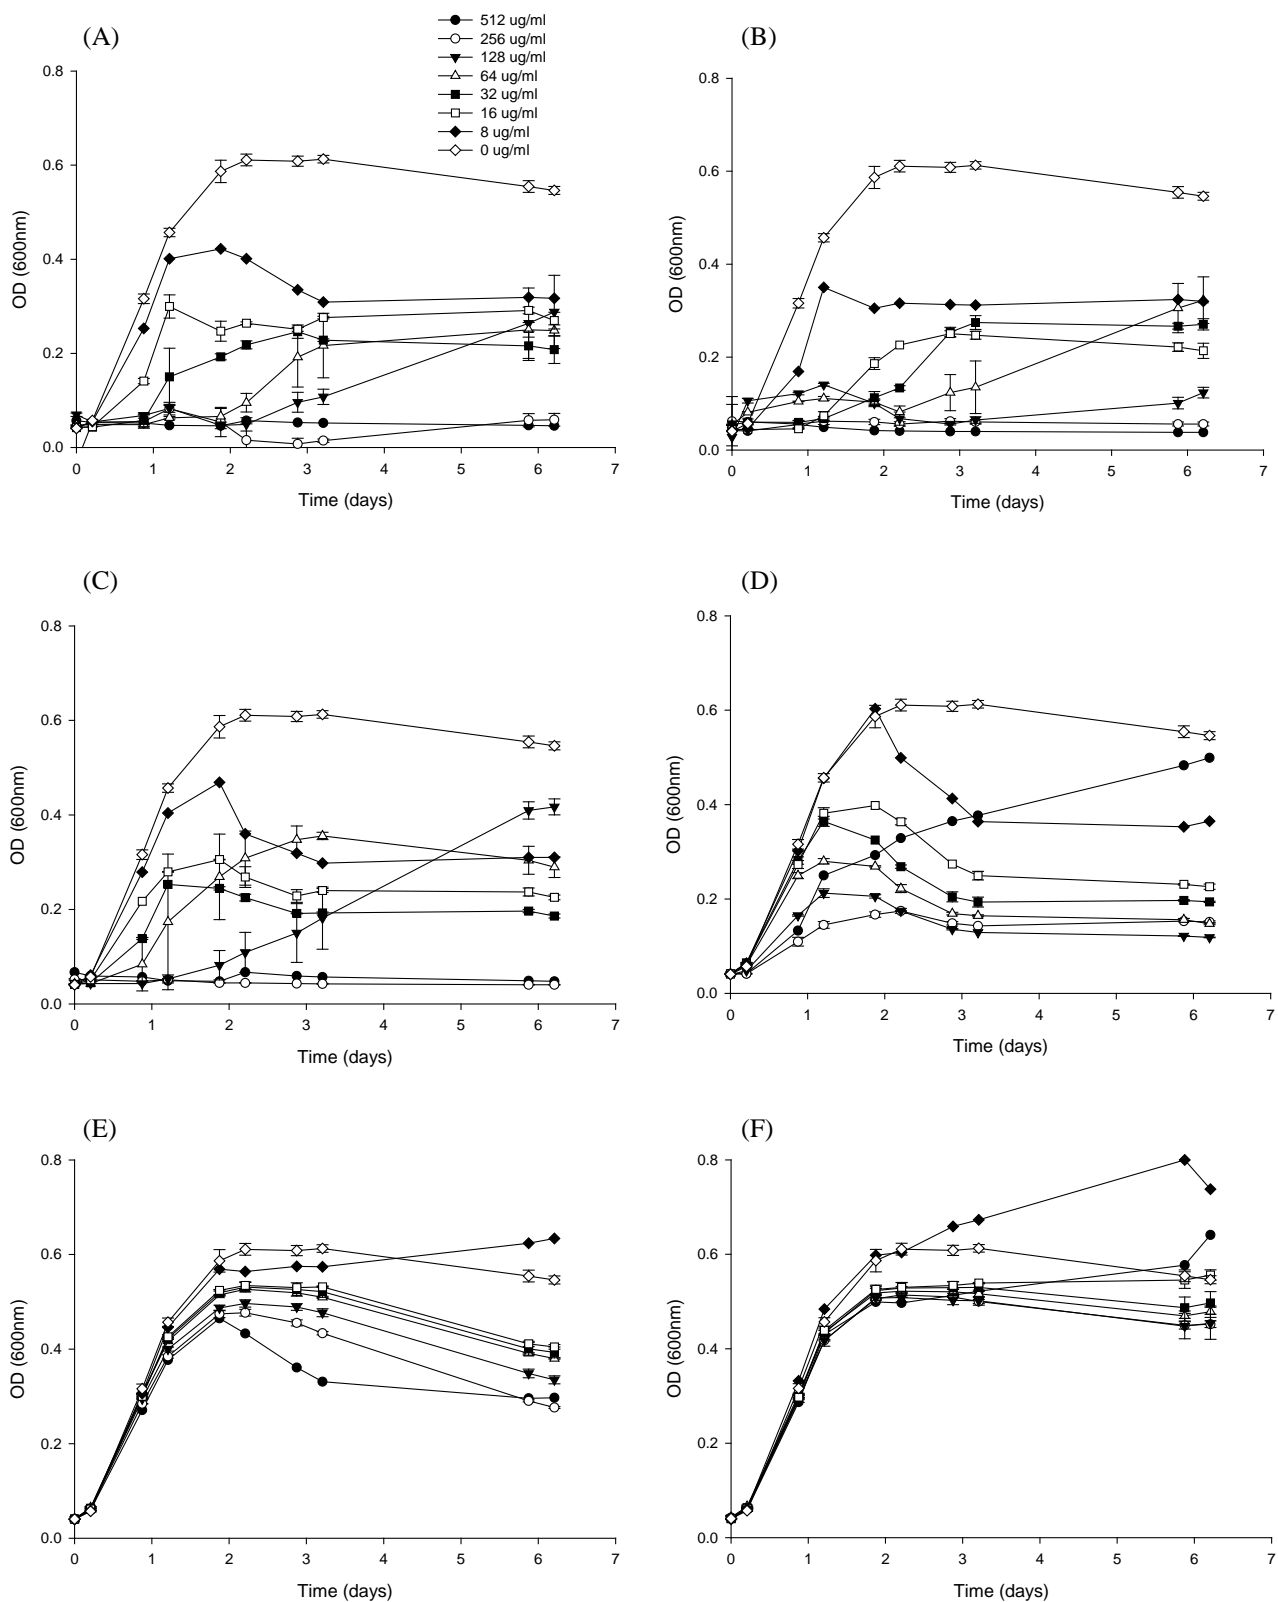

Fig. S1. Kinetics of growth (OD<sub>600</sub>) of *B. cenocepacia* HI2976 were measured in the BZK(A), C<sub>14</sub>BDMA-Cl(B), C<sub>12</sub>BDMA-Cl(C), C<sub>10</sub>BDMA-Cl(D), C<sub>6</sub>BDMA-Cl(E), and BTMA-Cl(F) in media with different concentrations. Symbols represent averages of triplicates from three samples and error bars represent the standard deviations.
