# Supplementary material for: Intrinsic Resistance of Burkholderia cepacia Complex to Benzalkonium Chloride
Source: PubMed Central journal article supplement (PMC5120141; doi:10.1128/mbio.01716-16), 2016-11-22
Supplement: mbo006163084sf3.pdf [file mbo006163084sf3.pdf]

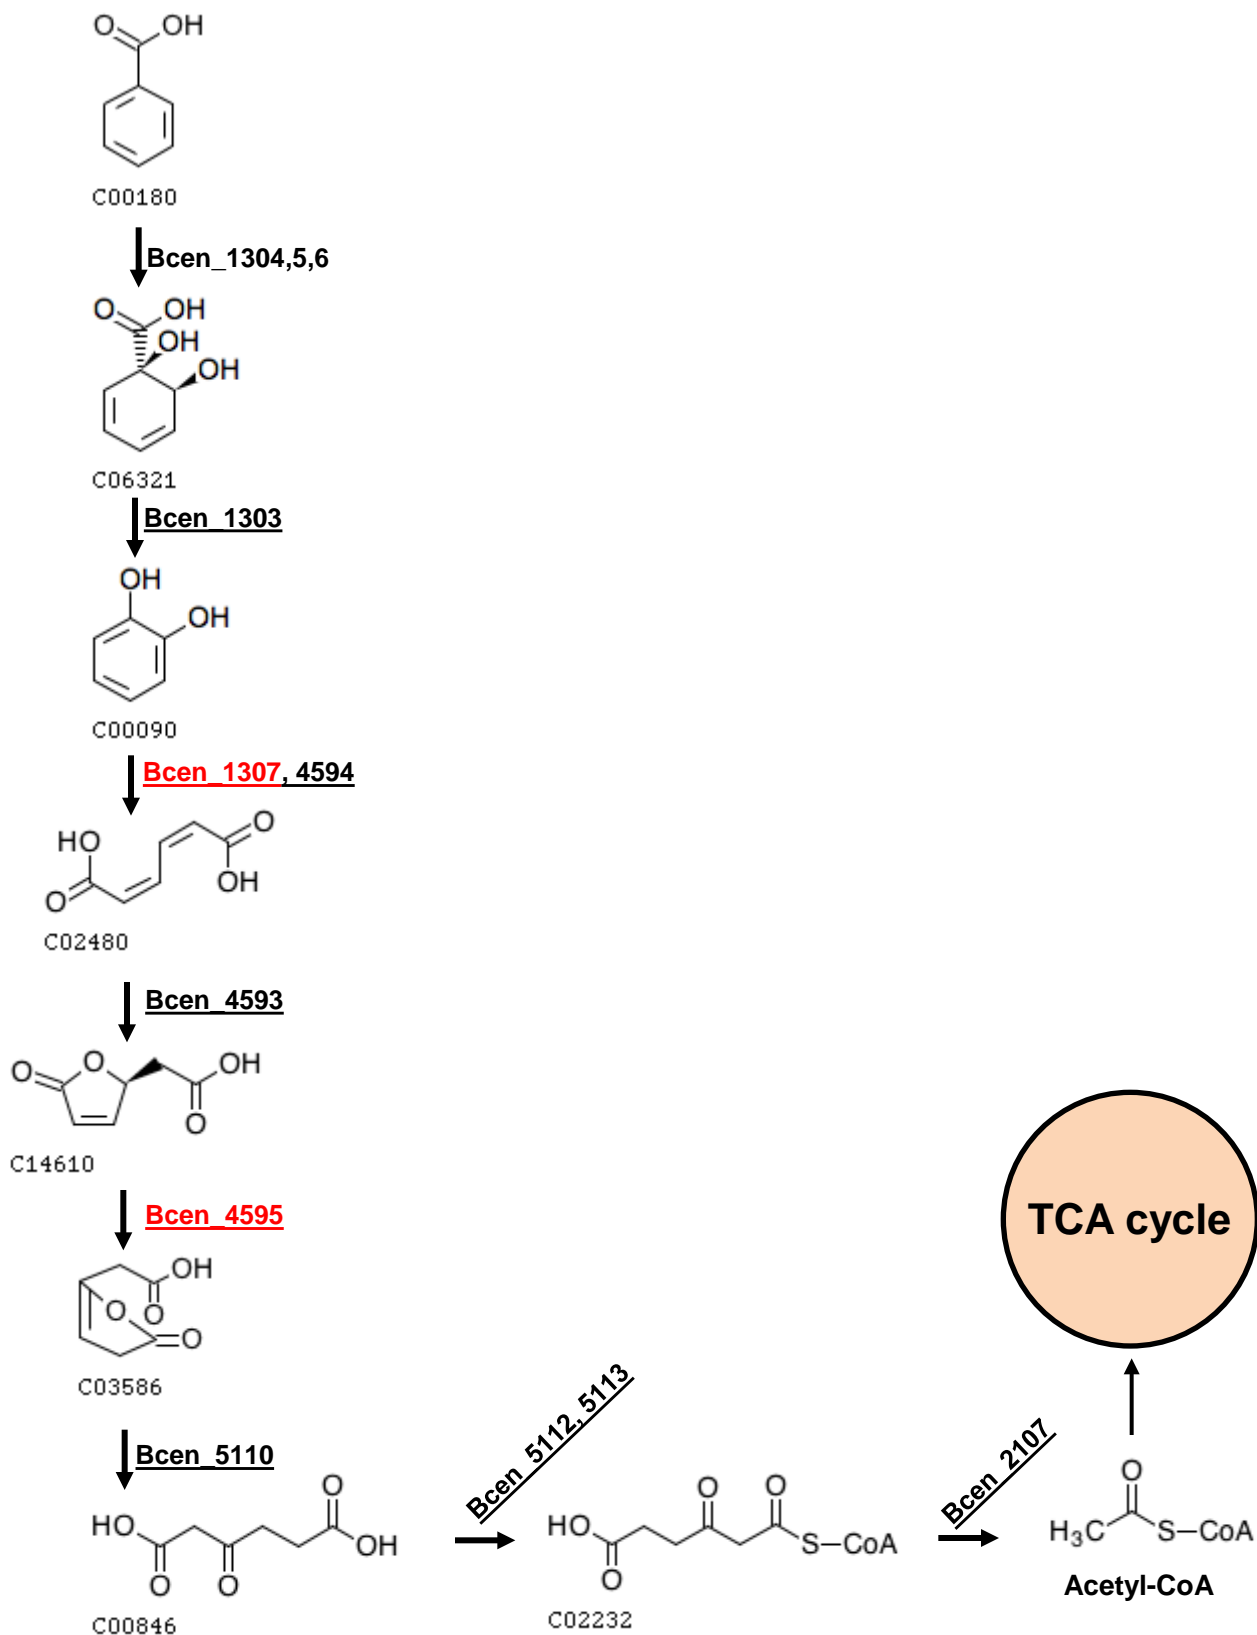

Fig. S3. Possible degradation pathway of benzoate in strain AU1054
